# Supplementary material for: Awake prone positioning for non-intubated oxygen dependent COVID-19 pneumonia patients
Source: PubMed Central journal article supplement — Eur Respir J. 2020 Jul 23;56(1):2001198. doi: 10.1183/13993003.01198-2020 (PMC7251246; doi:10.1183/13993003.01198-2020), 2020-07-23
Supplement: ERJ-01198-2020.Shareable.pdf [file ERJ-01198-2020.Shareable.pdf]

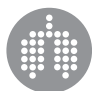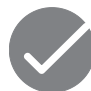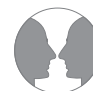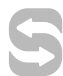

SHAREABLE PDF

# Awake prone positioning for non-intubated oxygen dependent COVID-19 pneumonia patients

Ziqin Ng <sup>1</sup>, Woo Chiao Tay<sup>2</sup> and Choon Heng Benjamin Ho <sup>1</sup>

**Affiliations:** <sup>1</sup>Dept of Respiratory and Critical Care Medicine, Tan Tock Seng Hospital, Singapore. <sup>2</sup>Dept of Internal Medicine, Tan Tock Seng Hospital, Singapore.

**Correspondence:** Ng Ziqin, Dept of Respiratory and Critical Care Medicine, Tan Tock Seng Hospital, 11 Jalan Tan Tock Seng, Singapore 308433. E-mail: [ziqin.ng@mohh.com.sg](mailto:ziqin.ng@mohh.com.sg)

@ERSpublications

**Adopting awake prone positioning in non-intubated patients with COVID-19 pneumonia is a low-risk, low-cost manoeuvre that may potentially delay or reduce the need for intensive care** <https://bit.ly/2LPUnTI>

**Cite this article as:** Ng Z, Tay WC, Ho CHB, *et al.* Awake prone positioning for non-intubated oxygen dependent COVID-19 pneumonia patients. *Eur Respir J* 2020; 56: 2001198 [<https://doi.org/10.1183/13993003.01198-2020>].

This single-page version can be shared freely online.

## To the Editor:

Oxygenation failure recalcitrant to increasing positive end-expiratory pressure is a feature of severe coronavirus disease 2019 (COVID-19) pneumonia [1]. A Chinese group used prone positioning to improve oxygenation for intubated patients with severe COVID-19 pneumonia [2]. However, prone positioning in unconscious patients is labour-intensive and is associated with various complications [3, 4]. As the incidence of severe COVID-19 pneumonia worldwide increases rapidly, many countries are also facing the problem of diminishing intensive care resources.
